# Supplementary material
Source: PubMed Central journal article supplement (PMC10570912)
Supplement: jamaoncol-e234415-s001.pdf [file jamaoncol-e234415-s001.pdf]

## Data Sharing Statement

Jemal. The Burden of Lung Cancer in Women Compared With Men in the US. *JAMA Oncol.* Published October 12, 2023. doi:10.1001/jamaoncol.2023.4415

### Data

**Data available:** Yes

**Data types:** Deidentified participant data

**How to access data:** <https://seer.cancer.gov/>

**When available:** With publication

### Supporting Documents

**Document types:** None

### Additional Information

**Who can access the data:** Anyone requesting the data.

**Types of analyses:** rate ratios

**Mechanisms of data availability:** Without investigator support. The data can be requested from NCI.
